# Supplementary material for: A Sex-Specific Comparative Analysis of Oxidative Stress Biomarkers Predicting the Risk of Cardiovascular Events and All-Cause Mortality in the General Population: A Prospective Cohort Study
Source: MDPI journal article supplement (doi:10.3390/antiox12030690), 2023-03-10
Supplement: s1 [file s1]

**Figure S1**

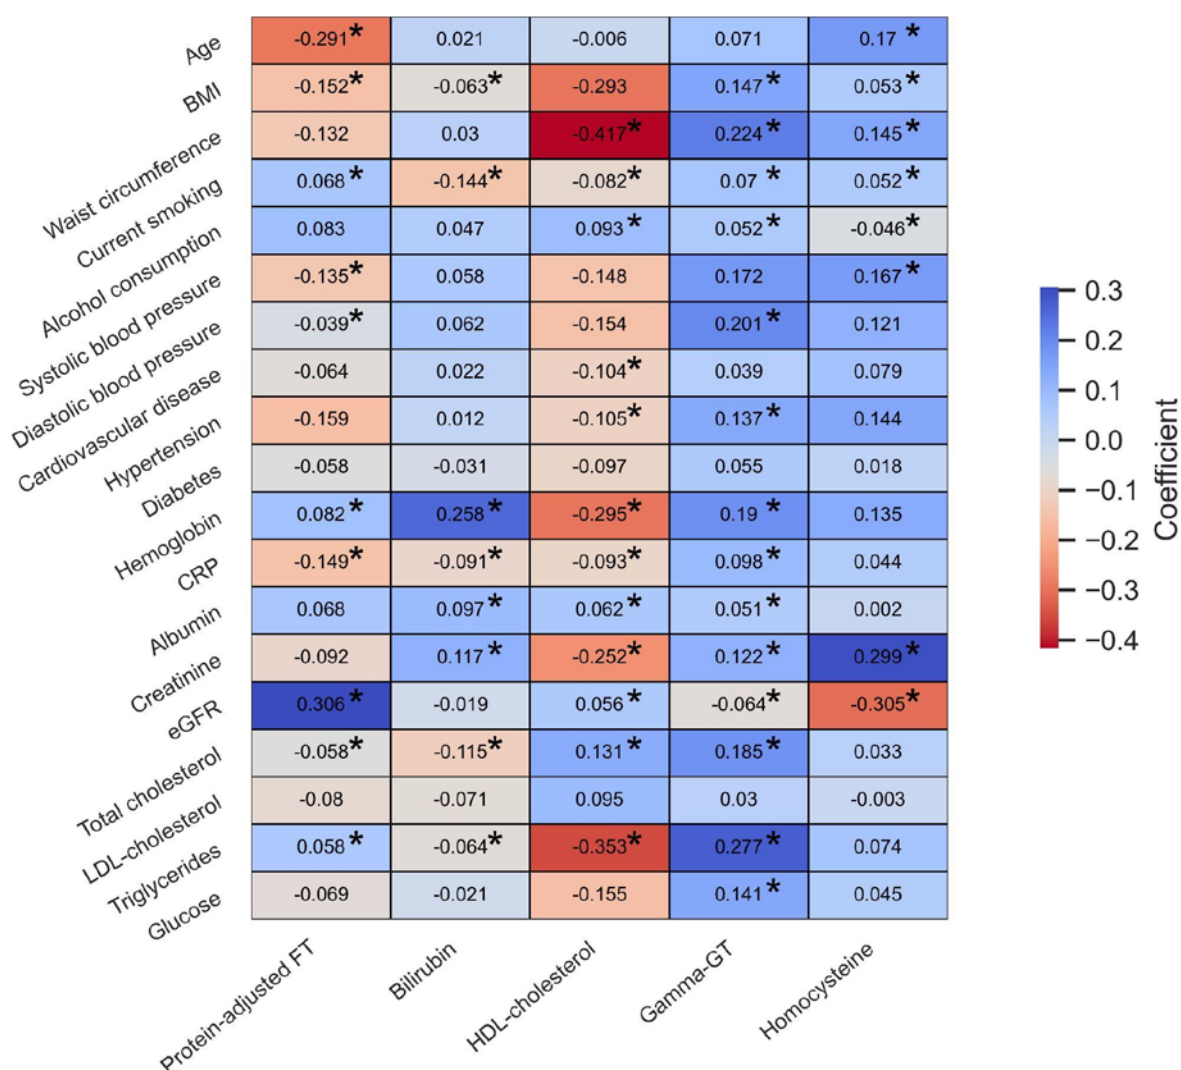

**Figure S1. Heatmap depicting crude associations between oxidative stress biomarkers and baseline demographic, anthropometric, clinical, and laboratory characteristics.** Numbers represent standardized beta-coefficients derived from univariable linear regression analysis, colored by the direction of the association (blue: positive; red: negative). Asterisks (\*) indicate statistically significant associations in multivariable analyses (see Supplementary Tables S1-S5).

**Table S1: Linear regression of protein-adjusted free thiols**

| Variable                          | Univariable analysis |                  | Multivariable analysis |                  |
|-----------------------------------|----------------------|------------------|------------------------|------------------|
|                                   | St. Beta             | <i>P</i> -value  | St. Beta               | <i>P</i> -value  |
| Age (years)                       | -0.291               | <b>&lt;0.001</b> | -0.126                 | <b>&lt;0.001</b> |
| BMI (kg/m <sup>2</sup> )          | -0.152               | <b>&lt;0.001</b> | -0.091                 | <b>&lt;0.001</b> |
| Waist circumference (cm)          | -0.132               | <b>&lt;0.001</b> |                        |                  |
| Current smoking (%)               | 0.068                | <b>&lt;0.001</b> | 0.038                  | <b>0.008</b>     |
| Alcohol use (%)                   | 0.083                | <b>&lt;0.001</b> |                        |                  |
| Systolic blood pressure (mmHg)    | -0.135               | <b>&lt;0.001</b> | -0.078                 | <b>&lt;0.001</b> |
| Diastolic blood pressure (mmHg)   | -0.039               | <b>0.003</b>     | 0.072                  | <b>&lt;0.001</b> |
| CVD history (%)                   | -0.064               | <b>&lt;0.001</b> |                        |                  |
| Hypertension (%)                  | -0.159               | <b>&lt;0.001</b> |                        |                  |
| Diabetes (%)                      | -0.058               | <b>&lt;0.001</b> |                        |                  |
| Laboratory parameters             |                      |                  |                        |                  |
| Hemoglobin (mmol/L)               | 0.082                | <b>&lt;0.001</b> | 0.089                  | <b>&lt;0.001</b> |
| hs-CRP (mg/L)                     | -0.149               | <b>&lt;0.001</b> | -0.082                 | <b>&lt;0.001</b> |
| Albumin (g/L)                     | 0.068                | <b>&lt;0.001</b> |                        |                  |
| Creatinine (μmol/L)               | -0.092               | <b>&lt;0.001</b> |                        |                  |
| eGFR (mL/min/1.73m <sup>2</sup> ) | 0.306                | <b>&lt;0.001</b> | 0.192                  | <b>&lt;0.001</b> |

|                            |        |                  |        |                  |
|----------------------------|--------|------------------|--------|------------------|
| Total cholesterol (mmol/L) | -0.058 | <b>&lt;0.001</b> | -0.037 | <b>0.015</b>     |
| LDL-cholesterol (mmol/L)   | -0.080 | 0.053            |        |                  |
| Triglycerides (mg/dL)      | 0.058  | <b>&lt;0.001</b> | 0.107  | <b>&lt;0.001</b> |
| Glucose (mmol/L)           | -0.069 | <b>&lt;0.001</b> |        |                  |

**Table S2: Linear regression of bilirubin**

| Variable                        | Univariable analysis |                  | Multivariable analysis |                  |
|---------------------------------|----------------------|------------------|------------------------|------------------|
|                                 | St. Beta             | P-value          | St. Beta               | P-value          |
| Age (years)                     | 0.021                | 0.105            |                        |                  |
| BMI (kg/m <sup>2</sup> )        | -0.063               | <b>&lt;0.001</b> | -0.076                 | <b>&lt;0.001</b> |
| Waist circumference (cm)        | 0.030                | <b>0.021</b>     |                        |                  |
| Current smoking (%)             | -0.144               | <b>&lt;0.001</b> | -0.165                 | <b>&lt;0.001</b> |
| Alcohol use (%)                 | 0.047                | <b>&lt;0.001</b> |                        |                  |
| Systolic blood pressure (mmHg)  | 0.058                | <b>&lt;0.001</b> |                        |                  |
| Diastolic blood pressure (mmHg) | 0.062                | <b>&lt;0.001</b> |                        |                  |
| CVD history (%)                 | 0.022                | 0.087            |                        |                  |
| Hypertension (%)                | 0.012                | 0.372            |                        |                  |
| Diabetes (%)                    | -0.031               | <b>0.017</b>     |                        |                  |
| Laboratory parameters           |                      |                  |                        |                  |

|                                      |        |                  |        |                  |
|--------------------------------------|--------|------------------|--------|------------------|
| Hemoglobin (mmol/L)                  | 0.258  | <b>&lt;0.001</b> | 0.300  | <b>&lt;0.001</b> |
| hs-CRP (mg/L)                        | -0.091 | <b>&lt;0.001</b> | -0.047 | <b>&lt;0.001</b> |
| Albumin (g/L)                        | 0.097  | <b>&lt;0.001</b> | 0.039  | <b>0.005</b>     |
| Creatinine (μmol/L)                  | 0.117  | <b>&lt;0.001</b> | 0.038  | <b>0.009</b>     |
| eGFR<br>(mL/min/1.73m <sup>2</sup> ) | -0.019 | 0.152            |        |                  |
| Total cholesterol<br>(mmol/L)        | -0.115 | <b>&lt;0.001</b> | -0.116 | <b>&lt;0.001</b> |
| LDL-cholesterol<br>(mmol/L)          | -0.071 | 0.086            |        |                  |
| Triglycerides (mg/dL)                | -0.064 | <b>&lt;0.001</b> | -0.077 | <b>&lt;0.001</b> |
| Glucose (mmol/L)                     | -0.021 | 0.111            |        |                  |

**Table S3: Linear regression of homocysteine**

| Variable                          | Univariable analysis |                  | Multivariable analysis |                  |
|-----------------------------------|----------------------|------------------|------------------------|------------------|
|                                   | St. Beta             | P-value          | St. Beta               | P-value          |
| Age (years)                       | 0.170                | <b>&lt;0.001</b> | -0.071                 | <b>&lt;0.001</b> |
| BMI (kg/m <sup>2</sup> )          | 0.053                | <b>&lt;0.001</b> | -0.138                 | <b>&lt;0.001</b> |
| Waist circumference<br>(cm)       | 0.145                | <b>&lt;0.001</b> | 0.145                  | <b>&lt;0.001</b> |
| Current smoking (%)               | 0.052                | <b>&lt;0.001</b> | 0.073                  | <b>&lt;0.001</b> |
| Alcohol use (%)                   | -0.046               | <b>&lt;0.001</b> | -0.039                 | <b>0.003</b>     |
| Systolic blood pressure<br>(mmHg) | 0.167                | <b>&lt;0.001</b> | 0.087                  | <b>&lt;0.001</b> |

|                                   |        |                  |        |                  |
|-----------------------------------|--------|------------------|--------|------------------|
| Diastolic blood pressure (mmHg)   | 0.121  | <b>&lt;0.001</b> |        |                  |
| CVD history (%)                   | 0.079  | <b>&lt;0.001</b> |        |                  |
| Hypertension (%)                  | 0.144  | <b>&lt;0.001</b> |        |                  |
| Diabetes (%)                      | 0.018  | 0.160            |        |                  |
| Laboratory parameters             |        |                  |        |                  |
| Hemoglobin (mmol/L)               | 0.135  | <b>&lt;0.001</b> |        |                  |
| hs-CRP (mg/L)                     | 0.044  | <b>0.003</b>     |        |                  |
| Albumin (g/L)                     | 0.002  | 0.893            |        |                  |
| Creatinine (μmol/L)               | 0.299  | <b>&lt;0.001</b> | 0.145  | <b>&lt;0.001</b> |
| eGFR (mL/min/1.73m <sup>2</sup> ) | -0.305 | <b>&lt;0.001</b> | -0.234 | <b>&lt;0.001</b> |
| Total cholesterol (mmol/L)        | 0.033  | <b>0.012</b>     |        |                  |
| LDL-cholesterol (mmol/L)          | -0.003 | 0.940            |        |                  |
| Triglycerides (mg/dL)             | 0.074  | <b>&lt;0.001</b> |        |                  |
| Glucose (mmol/L)                  | 0.045  | <b>0.001</b>     |        |                  |

**Table S4: Linear regression of gamma-GT**

| Variable    | Univariable analysis |                  | Multivariable analysis |         |
|-------------|----------------------|------------------|------------------------|---------|
|             | St. Beta             | P-value          | St. Beta               | P-value |
| Age (years) | 0.071                | <b>&lt;0.001</b> |                        |         |

|                                   |        |                  |        |                  |
|-----------------------------------|--------|------------------|--------|------------------|
| BMI (kg/m <sup>2</sup> )          | 0.147  | <b>&lt;0.001</b> | -0.055 | <b>0.036</b>     |
| Waist circumference (cm)          | 0.224  | <b>&lt;0.001</b> | 0.127  | <b>&lt;0.001</b> |
| Current smoking (%)               | 0.070  | <b>&lt;0.001</b> | 0.047  | <b>0.002</b>     |
| Alcohol use (%)                   | 0.052  | <b>&lt;0.001</b> | 0.044  | <b>0.003</b>     |
| Systolic blood pressure (mmHg)    | 0.172  | <b>&lt;0.001</b> |        |                  |
| Diastolic blood pressure (mmHg)   | 0.201  | <b>&lt;0.001</b> | 0.058  | <b>0.001</b>     |
| CVD history (%)                   | 0.039  | <b>0.003</b>     |        |                  |
| Hypertension (%)                  | 0.137  | <b>&lt;0.001</b> | 0.037  | <b>0.040</b>     |
| Diabetes (%)                      | 0.055  | <b>&lt;0.001</b> |        |                  |
| Laboratory parameters             |        |                  |        |                  |
| Hemoglobin (mmol/L)               | 0.190  | <b>&lt;0.001</b> | 0.050  | <b>0.005</b>     |
| hs-CRP (mg/L)                     | 0.098  | <b>&lt;0.001</b> | 0.072  | <b>&lt;0.001</b> |
| Albumin (g/L)                     | 0.051  | <b>&lt;0.001</b> | 0.032  | <b>0.028</b>     |
| Creatinine (μmol/L)               | 0.122  | <b>&lt;0.001</b> | 0.048  | <b>0.012</b>     |
| eGFR (mL/min/1.73m <sup>2</sup> ) | -0.064 | <b>&lt;0.001</b> | 0.067  | <b>&lt;0.001</b> |
| Total cholesterol (mmol/L)        | 0.185  | <b>&lt;0.001</b> | 0.094  | <b>&lt;0.001</b> |
| LDL-cholesterol (mmol/L)          | 0.030  | 0.472            |        |                  |
| Triglycerides (mg/dL)             | 0.277  | <b>&lt;0.001</b> | 0.156  | <b>&lt;0.001</b> |

|                  |       |                  |       |              |
|------------------|-------|------------------|-------|--------------|
| Glucose (mmol/L) | 0.141 | <b>&lt;0.001</b> | 0.048 | <b>0.002</b> |
|------------------|-------|------------------|-------|--------------|

**Table S5: Linear regression of high-density lipoprotein**

| Variable                        | Univariable analysis |                  | Multivariable analysis |                  |
|---------------------------------|----------------------|------------------|------------------------|------------------|
|                                 | St. Beta             | <i>P</i> -value  | St. Beta               | <i>P</i> -value  |
| Age (years)                     | -0.006               | 0.640            |                        |                  |
| BMI (kg/m <sup>2</sup> )        | -0.293               | <b>&lt;0.001</b> |                        |                  |
| Waist circumference (cm)        | -0.417               | <b>&lt;0.001</b> | -0.302                 | <b>&lt;0.001</b> |
| Current smoking (%)             | -0.082               | <b>&lt;0.001</b> | -0.079                 | <b>&lt;0.001</b> |
| Alcohol use (%)                 | 0.093                | <b>&lt;0.001</b> | 0.112                  | <b>&lt;0.001</b> |
| Systolic blood pressure (mmHg)  | -0.148               | <b>&lt;0.001</b> |                        |                  |
| Diastolic blood pressure (mmHg) | -0.154               | <b>&lt;0.001</b> |                        |                  |
| CVD history (%)                 | -0.104               | <b>&lt;0.001</b> | -0.038                 | <b>0.003</b>     |
| Hypertension (%)                | -0.105               | <b>&lt;0.001</b> | 0.048                  | <b>&lt;0.001</b> |
| Diabetes (%)                    | -0.097               | <b>&lt;0.001</b> |                        |                  |
| Laboratory parameters           |                      |                  |                        |                  |
| Hemoglobin (mmol/L)             | -0.295               | <b>&lt;0.001</b> | -0.131                 | <b>&lt;0.001</b> |
| hs-CRP (mg/L)                   | -0.093               | <b>&lt;0.001</b> | -0.036                 | <b>0.005</b>     |
| Albumin (g/L)                   | 0.062                | <b>&lt;0.001</b> | 0.066                  | <b>&lt;0.001</b> |

|                                          |        |                  |        |                  |
|------------------------------------------|--------|------------------|--------|------------------|
| Creatinine ( $\mu\text{mol/L}$ )         | -0.252 | <b>&lt;0.001</b> | -0.171 | <b>&lt;0.001</b> |
| eGFR<br>( $\text{mL/min/1.73m}^2$ )      | 0.056  | <b>&lt;0.001</b> | -0.134 | <b>&lt;0.001</b> |
| Total cholesterol<br>( $\text{mmol/L}$ ) | 0.131  | <b>&lt;0.001</b> | 0.272  | <b>&lt;0.001</b> |
| LDL-cholesterol<br>( $\text{mmol/L}$ )   | 0.095  | <b>0.022</b>     |        |                  |
| Triglycerides ( $\text{mg/dL}$ )         | -0.353 | <b>&lt;0.001</b> | -0.315 | <b>&lt;0.001</b> |
| Glucose ( $\text{mmol/L}$ )              | -0.155 | <b>&lt;0.001</b> |        |                  |
